# Supplementary material
Source: PubMed Central journal article supplement (PMC2847604)

PIK3CA\_Hs 1 .....MPP.RPSSGELWGH...LMPP.RITLVECLLPLNG.....MIVTLECLREATLTITKHETFKEARQYPLHQLLQD  
 PIK3CB\_Hs 1 .....MCFSPIMPPAMADILDIWAVDSQIASDGSIIVDFLLELTG.....IYIQLEVREATISYIKQMTLWQVHNYPMPFNLLMD  
 PIK3CD\_Hs 1 .....MPPGVDCPMEFWTKE...ENQSVVDFLLELTG.....VYLNFPVSRNANLSTIKQITWHRAQYEPPLPHMLSG  
 PIK3CG\_Hs 1 MELENYKQPVVLLREDNCRRRRRMKPRFAASLSMSMLIIEFVLPSTQRKCKSPETALLHVAGHGVEQMKAVWLRALETSVSADFYH  
 PIK3CG\_Ss 1 MELENYEQPVVLLREDNRRRRRRMKPRFAASLSMSMLIIEFVLPSTQRNTKTPTETALLHVAGHGVEQMKAVWLRALETSVSADFYH

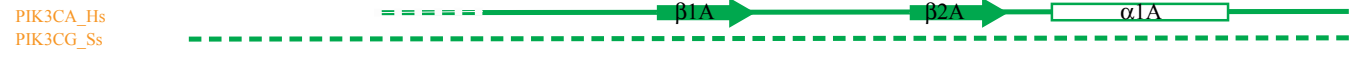

PIK3CA\_Hs 65 ES...SYIFVSVTQEAERREFFFD...ETRRLCDLRLRFQPFLLKVIETVGN.....REEKILNREITGFATGMPVCEFDMLKDPDEVDFRR  
 PIK3CB\_Hs 75 ID...SYMFAVCVNLVAVYEELED...ETRRLCDVRFPLFLVLEKLVTRSCD.....QDVFVFOVSPNMMIKVNELAIKQLT  
 PIK3CD\_Hs 65 PE...AVVFTCLNQTAEQELED...EORRLCDVQVPLFLVLRVLRVREGD.....RVKKLINSQISLITGKGLHDFDLSLQDEVNDFRA  
 PIK3CG\_Hs 90 RLGPDPHFLLLYQKKGQYIEIDKYQVQVTDCLFYVNRVLRSPQCHLVVQRHPPSEESQAFQRQLTALICYDVTDVSNVHDDLELFTRR  
 PIK3CG\_Ss 90 RLGPDPHFLLLYQKKGQYIEIDKYQVQVTDCLFYVNRVLRSPQCHLVVQRHPPSEETLAFQRQLNALICYDVTDVSNVHDDLELFTRR

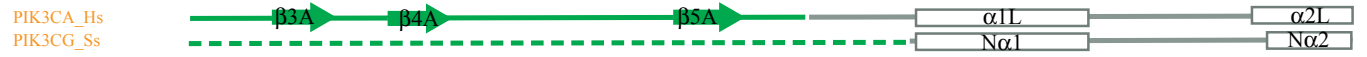

PIK3CA\_Hs 142 NITLVNCKEAVDLRDLNSPHSRIMYVYPPNVESPELPHKIYNKLDKQGITVVIWVTVSPNNDKQKQYTLKINHDCVPEQVIAEAIRKKTTR  
 PIK3CB\_Hs 151 KMRKFESEKLLSLVGLSWMWLKQTYPEHEPESIPEN...LEDKLYGGKLLIVAVHFN...QDVFVFOVSPNMMIKVNELAIKQLT  
 PIK3CD\_Hs 142 KMCQFCEEAARRQQLGWEAWLQYSFPLQLPESQATWGPGLRLPNRALLVNPKFEGS...ESFTFOVSTKDVPLALMACALRKKAT  
 PIK3CG\_Hs 179 GLVTPRMAEAVASRD...PKLYAMHPW...VTSKPLPEYLWKKIANNCIFIVIHRS...TTSQTIKVSPPDTPGAALQSFFTKMAK  
 PIK3CG\_Ss 179 RLVTPRMAEAVASRD...PKLYAMHPW...VTSKPLPEYLLKKTNNCVFIVIHRS...TTSQTIKVSADDTPGAALQSFFTKMAK

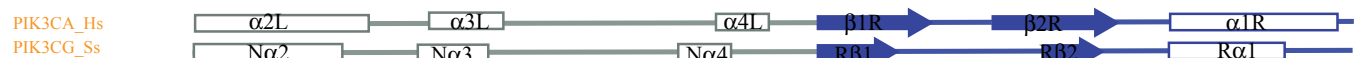

PIK3CA\_Hs 231 SMLLSEQLKLCVLEFYQGYHLKVCDCDEYFLEKYPLSQYKYSITRSMITLGRMPNLMIMAKESLY...SQLPMDCFMPSYSRRIST..AT  
 PIK3CB\_Hs 234 IHGKEDV.....VSPYDYLQVSGRVEYVFGDHPLIQFOYIRCSLHVMNRALPHFLVVECKIK...KMYEQEMIAIEAANNRNSNLPL  
 PIK3CD\_Hs 227 VFRQPLV.....EQPEDYTLQVNGRHHYLYGSYPLCQFOYIRCSLHVMNRALPHFLVVECKIK...AMRDEQSNPAPOVQKPRK...PP  
 PIK3CG\_Hs 255 KKSLLMDIPES...QSEQDFVLRVCGRDEYLVGETPIKKNFQWVRQCLKNGEEIHVLLDTPPPALDEVRKKEEWPLVDDTGVGTGYHEQL  
 PIK3CG\_Ss 255 KKSLLMDIPES...QNERDFVLRVCGRDEYLVGETPIKKNFQWVRQCLKNGEEIHVLLDTPPPALDEVRKKEEWPLVDDTGVGTGYHEQL

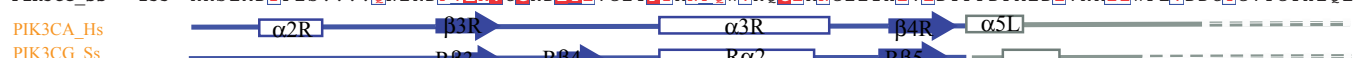

PIK3CA\_Hs 316 PYM...NGETSTKSLVWVINSALRRIKILCATYVNVNIRRIDKIYVRTGIYHGEPELDCDNNVNTQVVP...CSNPVWNEWLNVDIYIPDLPRAA  
 PIK3CB\_Hs 314 PLP...PKKTRISHVWENNPFQIVLVKGNKLN...TEEVTKVHVRAAGLFGHTEMLCKTIVSSSEVSGKNDHWIWNPFLEFDTICDLPMA  
 PIK3CD\_Hs 305 PIP...AKKPSVSLWVSLQPFRIELIIGSKVN...ADERMKLVVQAGLFGHTEMLCKTIVSSSEVSGKNDHWIWNPFLEFDTICDLPMA  
 PIK3CG\_Hs 340 TIHGKDHESVFTVSLWDCDRKFRVKIRGIDIVPLVRRNTDLTVFEANIQYQGVQLCQRR...TSPKPFTEVLLWNVWLEFSTKTKDLPKGA  
 PIK3CG\_Ss 340 TIHGKDHESVFTVSLWDCDRKFRVKIRGIDIVPLVRRNTDLTVFEANIQYQGVQLCQRR...TSPKPFTEVLLWNVWLEFSTKTKDLPKGA

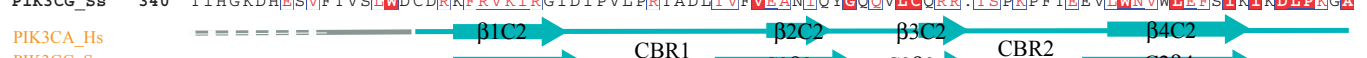

PIK3CA\_Hs 401 RLCLSLICSVKGR.....KGAKEHCFPLAWGNLFLDYDLDLVSGKMALNLPVPHGLELLNPIGVTTGSPNPN..K  
 PIK3CB\_Hs 399 RLCFAYAVAVLDKVKTKSTKTINPSKYQTIKAGKVHYPIVAWNVDFKGLRTGDIILHSWSSFPDELEMLNPMGTVQTNPY..T  
 PIK3CD\_Hs 389 RLCFALYAVIEKAKKARSTK.....KSKKADCPFAWNLMLFDYKDKLTKTGERCLYMWSSVPDEKGLLNPTGTVRSNPN..T  
 PIK3CG\_Hs 428 LLNLQIYCGKAPALSSKASAESPS.....SESKGVQLLYVNLILLDHRFLLRGEEYVLLHMQISGKGEDQGSFNADKLTSA TNPDK  
 PIK3CG\_Ss 428 LLNLQIYCGKAPALSGKTS AEMPS.....PESEKGAQLLYVNLILLDHRFLLRGEEYVLLHMQISGKGEDQGSFNADKLTSTR TNPDK

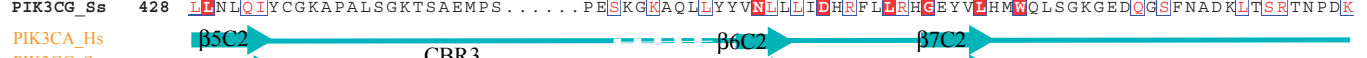

PIK3CA\_Hs 469 E.TPCTELEFDWFSS.VVKFPDMSVIEEHANWSVREAGFSYSHAGLSNRLARDNELRENDREQLKATSTRDPTSEITTEQEKDFTWHSR  
 PIK3CB\_Hs 486 ENATALHVKFPENKQPYYPFDKIIKAAEIASDSDS.....ANVSSRGGKKF.....LFLVLELIDRDDLSQLCENEMDLJWTLR  
 PIK3CD\_Hs 466 DSAALLICLPEVAPFPVYPALEKIDELG...RHSSEC.....VHVTEEE.....QLOLEALETATDPLNPLTAEDKELIWHFR  
 PIK3CG\_Hs 511 ENSMSISILLDNYPALPKHQPTDPPEGDRVRAEMP.....QLRKOLEALETATDPLNPLTAEDKELIWHFR  
 PIK3CG\_Ss 511 ENSMSISILLDNYPALPKHRPTDPPEGDRVRAEMP.....QLRKOLEALETATDPLNPLTAEDKELIWHFR

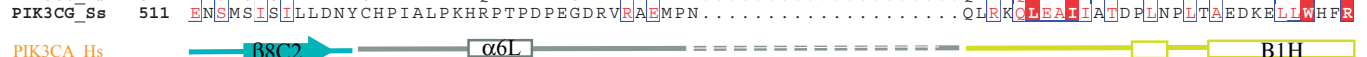

PIK3CA\_Hs 556 HVC.VTIPETLPLKLLSVKWNRSRDEVAQMYCLVVD...WPP...ITKPEQAMELDDCNYPDPMVGRGFAVRCLEKYLTDDKLSQYHLQVQV  
 PIK3CB\_Hs 563 QDCREIFPQSLPKLLLSIKWNKLEDEVAQLQALQI...WPK...LPPREALBLDDFNYPDQYVREYAVGCLRQMSDEBLSQYHLQVQV  
 PIK3CD\_Hs 536 HEVQEHFPEALARLLLVTKWNKHEVAQMLYLCS...WPE...LPLVLSALBLDDFSFPCDCHVGSFAKLRKLTDDLDFQYHLQVQV  
 PIK3CG\_Hs 580 YES.LKHPKAYPKLFSVSKWQQEIVARTYQLAKREVVDQSA LDVGLTMQLLDCNFSDENVRAIAVOKLESLEDDDLVHLYLQVQV  
 PIK3CG\_Ss 580 YES.LKDPKAYPKLFSVSKWQQEIVARTYQLAKREVVDQSA LDVGLTMQLLDCNFSDENVRAIAVOKLESLEDDDLVHLYLQVQV

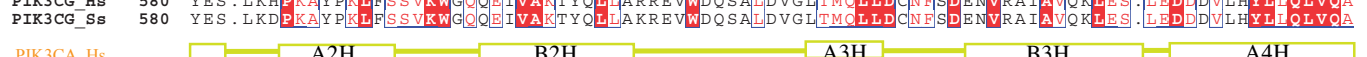

PIK3CA\_Hs 639 LKYEQYLDNLEVRFLLKKALETNORIGFFFWHLRSEMHNK.TVSRQFGLLELSYCRAC.GMYLKHNLNROVEAMEKLNITDILK...QEK  
 PIK3CB\_Hs 646 LKYEPLDLCALSRFLERLALGNRRIGQTFFWHLRSEVHIP.AVSVQFGLVLEAYCRGSG.VGHMKVLSKQVEALNKLKTLLNSLTK...LNA  
 PIK3CD\_Hs 619 LKYESYLDNLEVRFLLKKALETNORIGFFFWHLRSEMHV.P.SVALRFGVLEAYCRGSG.THHMKVLMKQVEALSLLKALNDLDFVK...LSS  
 PIK3CG\_Hs 667 VKFEPYHDSALARFLKRGRLRNKRIGFFFWHLRSEIAQSRHYQORFAVLEAYLRGCGTAMLDHDFTOQVQVIMLOKVTLIDIKSLSAE  
 PIK3CG\_Ss 667 VKFEPYHDSALARFLKRGRLRNKRIGFFFWHLRSEIAQSRHYQORFAVLEAYLRGCGTAMLDHDFTOQVQVIMLOKVTLIDIKSLSAE

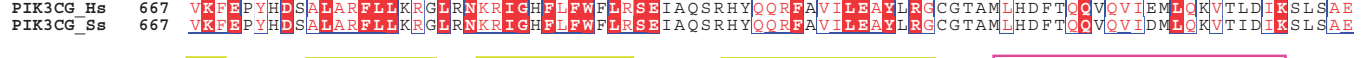

# SUPPLEMENTARY INFORMATION

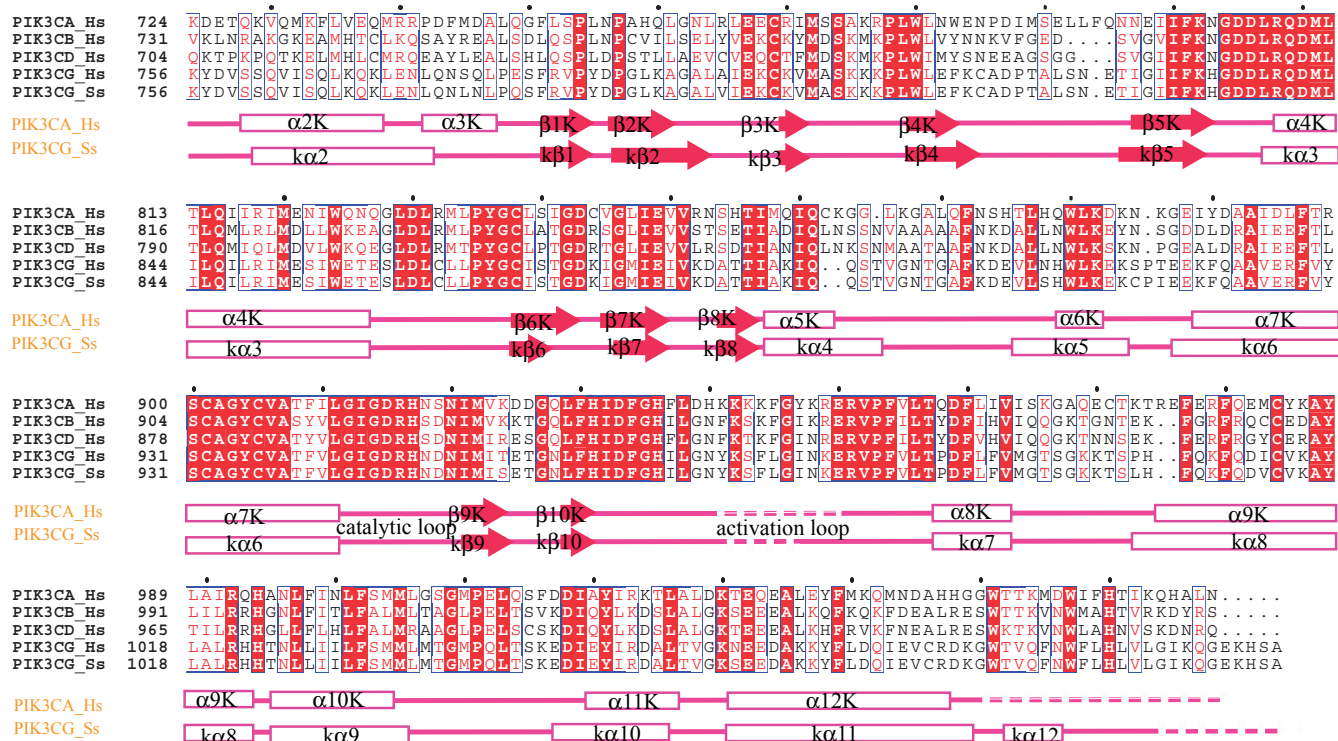

Supplement: NIHMS174365-supplement-supplement_1.pdf [file NIHMS174365-supplement-supplement_1.pdf]
