# Supplementary material
Source: PubMed Central journal article supplement (PMC2847604)

A

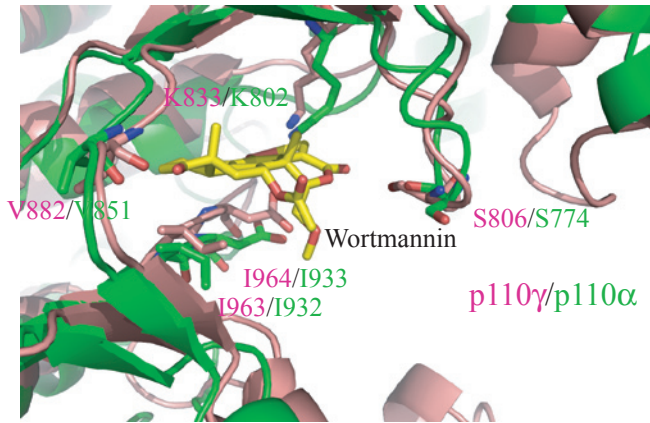

C

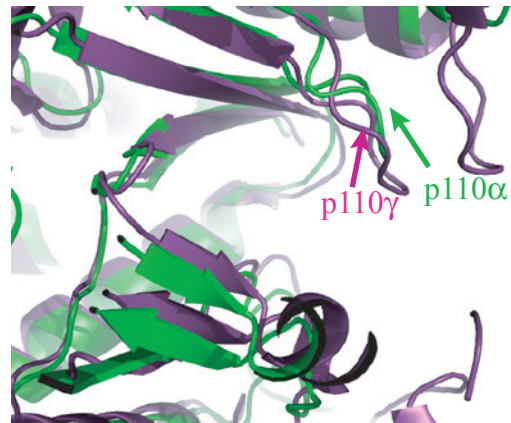

B

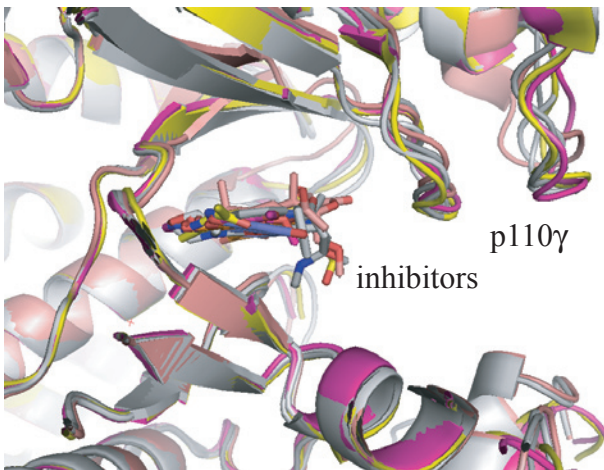

D

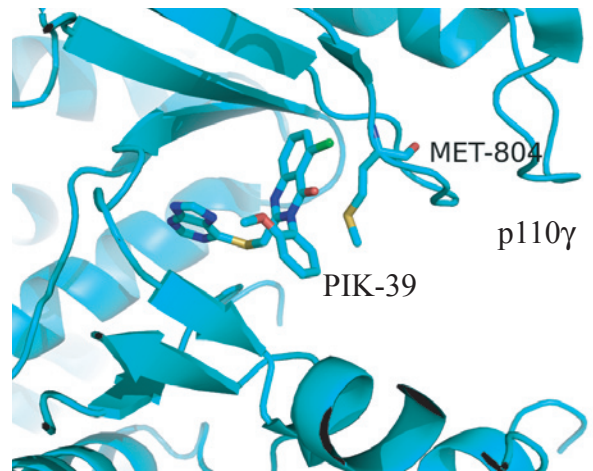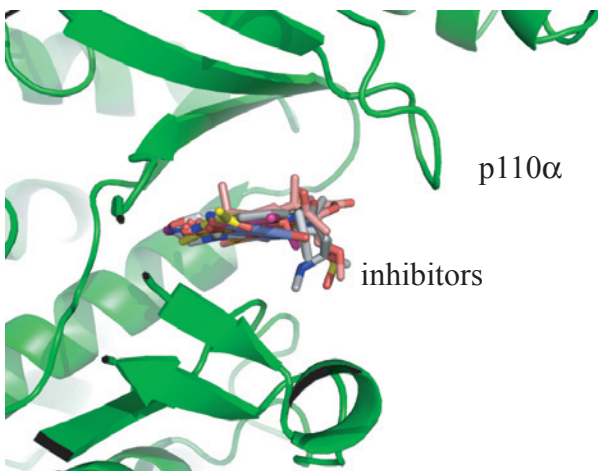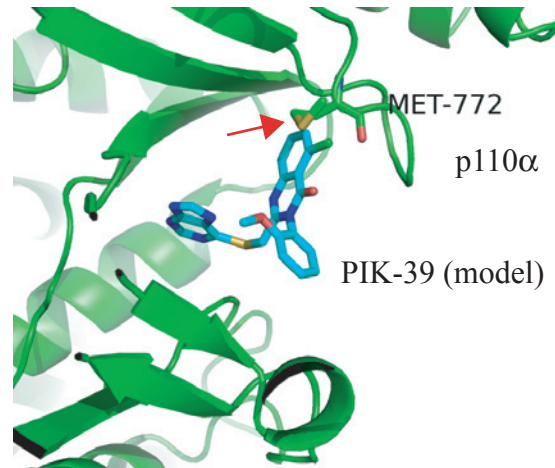

Supplement: NIHMS174365-supplement-supplement_2.pdf [file NIHMS174365-supplement-supplement_2.pdf]
